# Supplementary material for: Geographic origin and timing of colonization of the Pacific Coast of North America by the rocky shore gastropod Littorina sitkana
Source: PeerJ. 2019 Nov 4;7:e7987. doi: 10.7717/peerj.7987 (PMC6836758; doi:10.7717/peerj.7987)
Supplement: Table S1 — ABC model uniform prior distributions for demographic parameters. [file peerj-07-7987-s001.docx]

**Table S1** **ABC prior distributions.** ABC model uniform prior distributions for demographic parameters. Also see Figure 1.

**Model parameter Minimum Maximum**

COR *Ne* 10 200,000

KOD *Ne* 10 200,000

JUN *Ne* 10 200,000

PET *Ne* 10 500,000

ERI *Ne* 10 500,000

KHO *Ne* 10 500,000

STA *Ne* 10 500,000

*ta* 10 50,000

*tb* 10 200,000

*tc* 10 300,000

*td* 10 400,000

*te* 10 500,000

*tf* 10 600,000
